# Supplementary material
Source: MDPI journal article supplement (https://www.mdpi.com/2036-7481/12/4/63)
Supplement: s1 [file s1]

# Supplementary Material

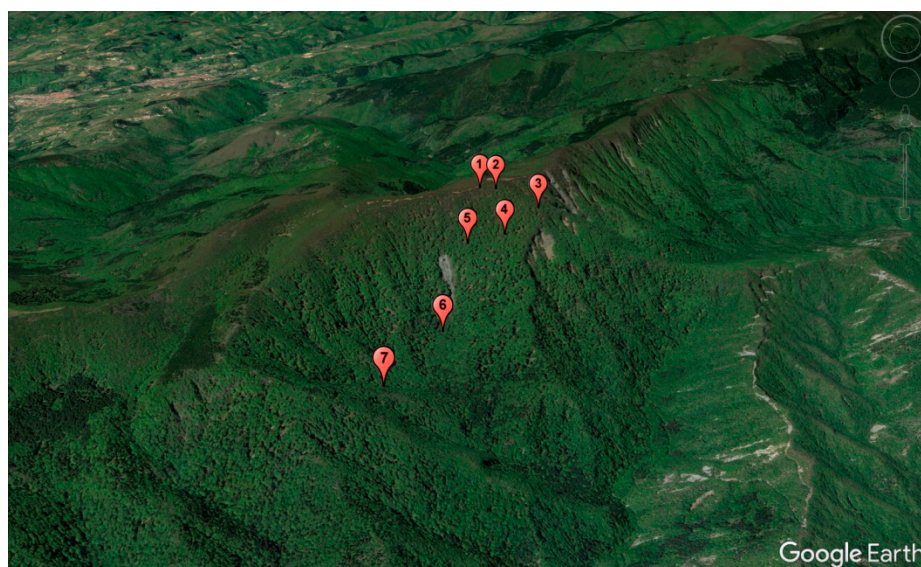

**Figure S1** Map of the sampling points

**Table S1** Soil samples chemical parameters measured, and methods used

| Parameter                     | Method                                    |
|-------------------------------|-------------------------------------------|
| Cr                            | UNI EN 13657:2004 + UNI EN ISO 11885:2009 |
| Zn                            | UNI EN 13657:2004 + UNI EN ISO 11885:2009 |
| Pb                            | UNI EN 13657:2004 + UNI EN ISO 11885:2009 |
| Cd                            | UNI EN 13657:2004 + UNI EN ISO 11885:2009 |
| Ni                            | UNI EN 13657:2004 + UNI EN ISO 11885:2009 |
| Cu                            | UNI EN 13657:2004 + UNI EN ISO 11885:2009 |
| As                            | UNI EN 13657:2004 + UNI EN ISO 11885:2009 |
| Fe                            | UNI EN 13657:2004 + UNI EN ISO 11885:2009 |
| Mn                            | UNI EN 13657:2004 + UNI EN ISO 11885:2009 |
| Se                            | UNI EN 13657:2004 + UNI EN ISO 11885:2009 |
| B                             | UNI EN 13657:2004 + UNI EN ISO 11885:2009 |
| Al                            | UNI EN 13657:2004 + UNI EN ISO 11885:2009 |
| TOC                           | UNI EN 13137:2002                         |
| SO <sub>4</sub> <sup>2-</sup> | APAT CNR IRSA 4020 Man 29 2003            |
| NO <sub>3</sub> <sup>-</sup>  | APAT CNR IRSA 4020 Man 29 2003            |
| F <sup>-</sup>                | APAT CNR IRSA 4020 Man 29 2003            |
| Nitrous N                     | APAT CNR IRSA 4050 Man 29 2003            |
| COD                           | ISPRA Man 117 2014                        |

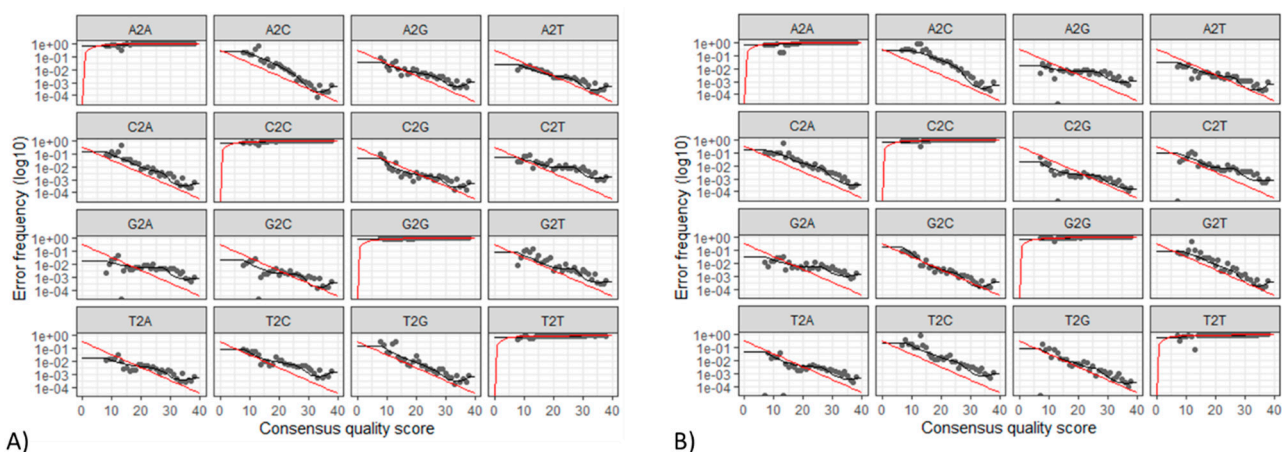

**Figure S2** Plots of the estimated error rates of the amplicon dataset. **A)** error rates of the forward reads; **B)** error rates of the reverse reads

**Table S2** Reads pair processing throughout the filtering steps

| Sample | raw   | noadapt | filtered | denoisedF | denoisedR | merged | nonchim | bacteria |
|--------|-------|---------|----------|-----------|-----------|--------|---------|----------|
| SF1S   | 97581 | 96272   | 75943    | 73840     | 74493     | 70239  | 68997   | 68995    |
| SF2S   | 70921 | 69751   | 54674    | 53775     | 54062     | 52406  | 51682   | 51682    |
| SF3S   | 82249 | 81086   | 64504    | 62277     | 62885     | 58521  | 57304   | 57301    |
| SF4S   | 79420 | 78383   | 60912    | 59723     | 60115     | 57834  | 57017   | 56980    |
| SF5S   | 90546 | 89389   | 69563    | 68749     | 69026     | 67204  | 66188   | 66150    |
| SF6S   | 81604 | 80438   | 62668    | 61916     | 62176     | 60808  | 60160   | 60160    |
| SF7S   | 73920 | 72637   | 57642    | 57264     | 57448     | 56923  | 56297   | 56297    |

**Table S3** Accession numbers of 16S rRNA gene sequences submitted to Gene Bank

| Strain | Accession number | Strain  | Accession number |
|--------|------------------|---------|------------------|
| SF1S1  | MW181140         | SF5S14  | MW181183         |
| SF1S2  | MW181141         | SF5S16  | MW181184         |
| SF1S3  | MW181142         | SF5S17  | MW181185         |
| SF1S4  | MW181143         | SF5S18  | MW181186         |
| SF1S8  | MW181144         | SF5S19  | MW181187         |
| SF1S10 | MW181144         | SF5S20  | MW181188         |
| SFS11  | MW181145         | SF5S22  | MW181189         |
| SF2S1  | MW181146         | SF5S23  | MW181190         |
| SF2S2  | MW181147         | SF5S24  | MW181191         |
| SF2S6  | MW181148         | SF5S25a | MW181192         |
| SF2S9  | MW181149         | SF5S25b | MW181193         |
| SF2S10 | MW181150         | SF6S1   | MW181194         |
| SF2S14 | MW181151         | SF6S2   | MW181195         |

|         |          |        |          |
|---------|----------|--------|----------|
| SF2S24  | MW181152 | SF6S5  | MW181196 |
| SF3S1   | MW181153 | SF6S7  | MW181195 |
| SF3S3   | MW181154 | SF6S11 | MW181197 |
| SF3S4   | MW181155 | SF6S12 | MW181198 |
| SF3S5   | MW181156 | SF6S13 | MW181199 |
| SF3S6   | MW181157 | SF6S14 | MW181200 |
| SF3S7   | MW181158 | SF6S16 | MW181201 |
| SF3S9   | MW181159 | SF6S17 | MW181202 |
| SF3S11  | MW181160 | SF6S21 | MW181203 |
| SF3S20  | MW181161 | SF6S22 | MW181204 |
| SF3S21  | MW181162 | SF6S23 | MW181205 |
| SF3S25  | MW181163 | SF6S24 | MW181206 |
| SF4S1   | MW181164 | SF6S25 | MW181207 |
| SF4S2   | MW181165 | SF7S2  | MW181208 |
| SF4S3   | MW181166 | SF7S3  | MW181209 |
| SF4S4   | MW181167 | SF7S5  | MW181210 |
| SF4S5   | MW181168 | SF7S7  | MW181211 |
| SF4S8   | MW181169 | SF7S8  | MW181212 |
| SF4S11  | MW181170 | SF7S9  | MW181213 |
| SF4S16  | MW181171 | SF7S10 | MW181214 |
| SF4S19  | MW181172 | SF7S11 | MW181215 |
| SF4S21a | MW181165 | SF7S12 | MW181216 |
| SF4S23  | MW181173 | SFS713 | MW181217 |
| SF5S5   | MW181174 | SF7S14 | MW181218 |
| SF5S6   | MW181175 | SF7S15 | MW181219 |
| SF5S7   | MW181176 | SF7S17 | MW181220 |
| SF5S8   | MW181177 | SF7S18 | MW181221 |
| SF5S9   | MW181178 | SF7S20 | MW181222 |
| SF5S10  | MW181179 | SF7S21 | MW181223 |
| SF5S11  | MW181180 | SF7S22 | MW181224 |
| SF5S12  | MW181181 | SF7S23 | MW181225 |
| SF5S13  | MW181182 |        |          |

**Table S4** Values of measured soil chemical compounds

| Parameter                     | Unit                   | Sample          |                 |                 |                 |                |                 |                 |
|-------------------------------|------------------------|-----------------|-----------------|-----------------|-----------------|----------------|-----------------|-----------------|
|                               |                        | SF1S            | SF2S            | SF3S            | SF4S            | SF5S           | SF6S            | SF7S            |
| Cr                            | mg/K<br>g s.s.         | 31 ± 12         | 28 ± 11         | 36 ± 14         | 36 ± 14         | 14 ± 6         | 30 ± 12         | 38 ± 15         |
| Zn                            | mg/K<br>g s.s.         | 75 ± 23         | 105 ± 32        | 82 ± 25         | 91 ± 27         | 46 ± 14        | 89 ± 27         | 84 ± 25         |
| Pb                            | mg/K<br>g s.s.         | 22 ± 7          | 59 ± 18         | 31 ± 9          | 46 ± 14         | 34 ± 10        | 35 ± 11         | 30 ± 9          |
| Cd                            | mg/K<br>g s.s.         | <1              | <1              | <1              | <1              | <1             | <1              | <1              |
| Ni                            | mg/K<br>g s.s.         | 23 ± 7          | 18 ± 5          | 32 ± 10         | 31 ± 9          | 13 ± 4         | 26 ± 8          | 32 ± 10         |
| Cu                            | mg/K<br>g s.s.         | 13 ± 4          | 18 ± 5          | 20 ± 6          | 20 ± 6          | 20 ± 6         | 21 ± 6          | 21 ± 6          |
| As                            | mg/K<br>g s.s.         | 5 ± 2           | 6 ± 2           | 6 ± 2           | 7 ± 2           | 2 ± 1          | 5 ± 2           | 6 ± 2           |
| Fe                            | mg/K<br>g s.s.         | 21247 ±<br>6374 | 17437 ±<br>5231 | 23404 ±<br>7021 | 27101 ±<br>8130 | 4197 ±<br>1259 | 19586 ±<br>5876 | 24547 ±<br>7364 |
| Mn                            | mg/K<br>g s.s.         | 387 ± 116       | 270 ± 81        | 583 ± 175       | 553 ± 166       | 114 ± 34       | 378 ± 113       | 366 ± 110       |
| Se                            | mg/K<br>g s.s.         | <1              | <1              | <1              | <1              | <1             | <1              | 4 ± 1           |
| B                             | mg/K<br>g s.s.         | 12 ± 4          | 10 ± 3          | 13 ± 4          | 10 ± 3          | 17 ± 5         | 19 ± 6          | 19 ± 6          |
| Al                            | mg/K<br>g s.s.         | 17979           | 14693           | 17553           | 19319           | 3520           | 14914           | 18605           |
| TOC                           | %C                     | 5.1             | 25.4            | 9.8             | 6.0             | 39.3           | 16.9            | 10.6            |
| SO <sub>4</sub> <sup>2-</sup> | mg/l                   | 24 ± 4          | 59 ± 9          | 23 ± 3          | 24 ± 4          | 66 ± 10        | 25 ± 4          | 70 ± 11         |
| NO <sub>3</sub> <sup>-</sup>  | mg/l                   | 194 ± 29        | 290 ± 44        | 268 ± 40        | 194 ± 29        | 386 ± 58       | 2.0 ± 0.3       | 252 ± 38        |
| F <sup>-</sup>                | mg/l                   | 0.1 ± 0.1       | 0.2 ± 0.1       | 0.1 ± 0.1       | 0.1 ± 0.1       | 0.4 ± 0.1      | 0.1 ± 0.1       | 0.1 ± 0.1       |
| Nitrous N                     | mg/l<br>N              | 1.14 ±<br>0.18  | 0.05 ±<br>0.01  | 5.09 ±<br>0.81  | 2.97 ±<br>0.48  | <0.02          | <0.02           | 3.38 ±<br>0.54  |
| COD                           | mg/l<br>O <sub>2</sub> | 81 ± 24         | 336 ± 67        | 234 ± 47        | 153 ± 31        | 360 ± 72       | 390 ± 78        | 219 ± 44        |

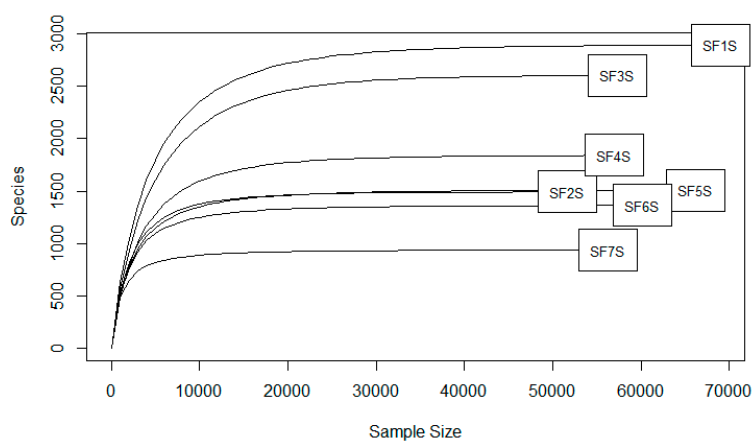**Figure S3** Rarefaction curves for the samples

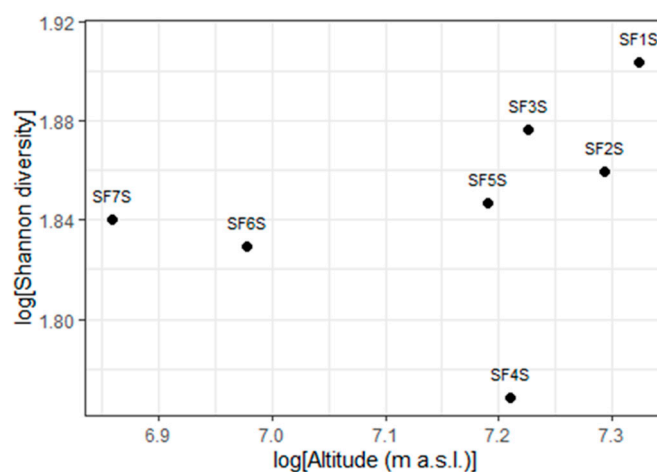

**Figure S4** Absence of correlation between soil sample bacterial diversity and altitude of samples collection points. Log transformation of data has been performed

**Table S5** Fitting of chemical composition on the ordination analysis of soil samples based on bacterial community composition

| Compound                      | CA1      | CA2      | r2     | Pr(>r) |
|-------------------------------|----------|----------|--------|--------|
| Cr                            | -0.99970 | 0.02464  | 0.2550 | 0.429  |
| Zn                            | -0.79602 | 0.60527  | 0.0917 | 0.685  |
| Pb                            | 0.98310  | -0.18308 | 0.0868 | 0.777  |
| Ni                            | -0.98823 | 0.15297  | 0.3437 | 0.419  |
| Cu                            | -0.98796 | 0.15471  | 0.2155 | 0.396  |
| As                            | -0.99765 | 0.06851  | 0.0742 | 0.713  |
| Fe                            | -0.98399 | 0.17823  | 0.1705 | 0.555  |
| Mn                            | -0.52459 | 0.85135  | 0.1100 | 0.761  |
| Se                            | -0.79208 | -0.61041 | 0.9985 | 0.145  |
| B                             | -0.99099 | 0.13391  | 0.5225 | 0.150  |
| Al                            | -0.98774 | 0.15613  | 0.1393 | 0.546  |
| TOC                           | 0.93770  | -0.34744 | 0.1103 | 0.814  |
| SO <sub>4</sub> <sup>2-</sup> | -0.21261 | -0.97714 | 0.5416 | 0.104  |
| NO <sub>3</sub> <sup>-</sup>  | 0.53118  | -0.84726 | 0.7816 | 0.079  |
| F <sup>-</sup>                | 0.86333  | -0.50464 | 0.2973 | 0.330  |
| Nitrous N                     | -0.76832 | -0.64007 | 0.1082 | 0.877  |
| COD                           | -0.32046 | 0.94726  | 0.1020 | 0.891  |

**Table S6** Distribution of the RAPD haplotypes and taxonomy of bacteria associated to the soil samples in Sasso Fratino

| <b>RAPD<br/>haplotype</b> | <b>SF1S</b>          | <b>SF2S</b>  | <b>SF3S</b>         | <b>SF4S</b> | <b>SF5S</b> | <b>SF6S</b> | <b>SF7S</b> | <b>Taxonomy</b>      |
|---------------------------|----------------------|--------------|---------------------|-------------|-------------|-------------|-------------|----------------------|
| <b>1</b>                  | 4                    |              |                     |             |             |             |             | <i>Agrobacterium</i> |
| <b>2</b>                  | 5;7;9;11;12;16;17;21 | 2;3;4;5;8;12 | 3;8;10;14;17;22     | 11;17;18    | 11;15       |             | 2           | <i>Agrobacterium</i> |
| <b>3</b>                  |                      |              |                     |             |             |             | 17          | <i>Agrococcus</i>    |
| <b>4</b>                  |                      | 6;7;11;17;18 |                     |             |             |             |             | <i>Agromyces</i>     |
| <b>5</b>                  |                      |              | 9;12;13;15;16;18;23 |             |             |             |             | <i>Agromyces</i>     |
| <b>6</b>                  |                      |              |                     | 2;21b;22    | 9           |             |             | <i>Agromyces</i>     |
| <b>7</b>                  |                      |              |                     | 8;20        |             |             |             | <i>Agromyces</i>     |
| <b>8</b>                  |                      |              |                     | 21a         |             |             |             | <i>Agromyces</i>     |
| <b>9</b>                  |                      |              |                     |             | 10          |             |             | <i>Agromyces</i>     |
| <b>10</b>                 |                      |              |                     |             | 12          |             |             | <i>Agromyces</i>     |
| <b>11</b>                 |                      |              |                     |             | 19          |             |             | <i>Agromyces</i>     |
| <b>12</b>                 |                      |              |                     |             | 23          |             |             | <i>Agromyces</i>     |
| <b>13</b>                 |                      |              |                     |             | 24          |             |             | <i>Agromyces</i>     |
| <b>14</b>                 |                      |              |                     |             |             |             | 13          | <i>Arthrobacter</i>  |
| <b>15</b>                 | 1                    |              |                     |             |             |             |             | <i>Bacillus</i>      |
| <b>16</b>                 | 2                    |              |                     |             |             |             |             | <i>Bacillus</i>      |
| <b>17</b>                 | 3                    |              |                     |             |             |             |             | <i>Bacillus</i>      |
| <b>18</b>                 |                      |              | 1;2                 |             |             |             |             | <i>Bacillus</i>      |
| <b>19</b>                 |                      |              | 5                   |             |             |             |             | <i>Bacillus</i>      |
| <b>20</b>                 |                      |              |                     | 19          |             |             |             | <i>Bacillus</i>      |
| <b>21</b>                 |                      |              |                     | 23          |             |             |             | <i>Bacillus</i>      |
| <b>22</b>                 |                      |              |                     |             | 22          |             |             | <i>Bacillus</i>      |
| <b>23</b>                 |                      |              |                     |             | 25a         |             |             | <i>Bacillus</i>      |
| <b>24</b>                 |                      |              |                     |             | 25b         |             |             | <i>Bacillus</i>      |
| <b>25</b>                 |                      |              |                     |             |             | 2;10        |             | <i>Bacillus</i>      |

|    |                         |                     |    |              |    |        |                           |
|----|-------------------------|---------------------|----|--------------|----|--------|---------------------------|
| 26 |                         |                     |    |              | 7  |        | <i>Bacillus</i>           |
| 27 |                         |                     |    |              | 14 |        | <i>Bacillus</i>           |
| 28 |                         |                     |    |              |    | 3      | <i>Bacillus</i>           |
| 29 |                         |                     |    |              |    | 10     | <i>Bacillus</i>           |
| 30 |                         | 1                   |    |              |    |        | <i>Bacillus</i>           |
| 31 |                         |                     |    |              | 25 |        | <i>Cedecea</i>            |
| 32 |                         |                     |    |              |    | 14     | <i>Chryseobacterium</i>   |
| 33 |                         |                     | 6  |              |    |        | <i>Chryseobacterium</i>   |
| 34 |                         |                     |    |              |    | 1;5;24 | <i>Chryseobacterium</i>   |
| 35 |                         |                     |    |              |    | 4;6;18 | <i>Chryseobacterium</i>   |
| 36 |                         |                     |    |              |    | 8      | <i>Chryseobacterium</i>   |
| 37 |                         |                     |    |              | 1  |        | <i>Ewingella/Rahnella</i> |
| 38 |                         |                     | 11 |              |    |        | <i>Flavobacterium</i>     |
| 39 |                         |                     |    |              | 12 |        | <i>Klebsiella</i>         |
| 40 | 6;8;14;19;22            |                     |    |              |    |        | <i>Kokuria</i>            |
| 41 | 10;13;15;18;20;23;24;25 |                     |    |              |    |        | <i>Kokuria</i>            |
| 42 |                         |                     |    |              | 22 |        | <i>Kokuria</i>            |
| 43 |                         |                     |    |              | 23 |        | <i>Kokuria</i>            |
| 44 |                         |                     |    |              |    | 20     | <i>Kokuria</i>            |
| 45 |                         |                     |    |              | 13 |        | <i>Microbacterium</i>     |
| 46 |                         |                     |    |              | 14 |        | <i>Microbacterium</i>     |
| 47 |                         |                     |    |              | 16 |        | <i>Microbacterium</i>     |
| 48 |                         |                     |    |              | 24 |        | <i>Microbacterium</i>     |
| 49 |                         | 9;13;15;20;21;22;23 |    |              |    |        | <i>Micrococcus</i>        |
| 50 |                         | 10;19               |    |              |    |        | <i>Micrococcus</i>        |
| 51 |                         | 24                  |    |              |    |        | <i>Micrococcus</i>        |
| 52 |                         |                     |    | 3;7;10;14;15 |    |        | <i>Micrococcus</i>        |
| 53 |                         |                     |    |              | 5  |        | <i>Micrococcus</i>        |
| 54 |                         |                     |    |              | 7  |        | <i>Micrococcus</i>        |
| 55 |                         |                     |    |              | 17 |        | <i>Micrococcus</i>        |
| 56 |                         |                     |    |              | 18 |        | <i>Micrococcus</i>        |

|                |    |       |    |             |    |      |      |                         |
|----------------|----|-------|----|-------------|----|------|------|-------------------------|
| 57             |    |       |    |             | 20 |      |      | <i>Micrococcus</i>      |
| 58             |    |       |    |             |    |      | 12   | <i>Micrococcus</i>      |
| 59             |    |       |    |             |    |      | 23   | <i>Micrococcus</i>      |
| 60             |    |       |    |             | 8  |      |      | <i>Moraxella</i>        |
| 61             |    | 14;16 |    |             |    |      |      | <i>Pantoea</i>          |
| 62             |    |       |    | 5;6;9;13;24 |    |      |      | <i>Pantoea</i>          |
| 63             |    |       |    |             |    | 17   |      | <i>Pantoea</i>          |
| 64             |    |       | 7  |             |    |      |      | <i>Pseudomonas</i>      |
| 65             |    |       |    |             | 6  |      |      | <i>Pseudomonas</i>      |
| 66             |    |       |    |             |    | 5; 9 |      | <i>Pseudomonas</i>      |
| 67             |    |       |    |             |    | 16   |      | <i>Pseudomonas</i>      |
| 68             |    |       |    |             |    | 21   |      | <i>Pseudomonas</i>      |
| 69             |    |       |    |             |    |      | 11   | <i>Pseudomonas</i>      |
| 70             |    |       |    |             |    |      | 21   | <i>Pseudomonas</i>      |
| 71             |    |       |    |             |    |      | 22   | <i>Pseudomonas</i>      |
| 72             |    |       |    |             |    | 11   |      | <i>Rhodococcus</i>      |
| 73             |    |       | 25 |             |    |      |      | <i>Serratia</i>         |
| 74             |    |       |    |             |    |      | 7;19 | <i>Serratia</i>         |
| 75             |    |       | 4  | 1           |    |      |      | <i>Staphylococcus</i>   |
| 76             |    |       | 20 |             |    |      |      | <i>Staphylococcus</i>   |
| 77             |    |       | 21 |             |    |      |      | <i>Staphylococcus</i>   |
| 78             |    |       |    | 4;12        |    |      |      | <i>Staphylococcus</i>   |
| 79             |    |       |    | 16          |    |      |      | <i>Staphylococcus</i>   |
| 80             |    |       |    |             |    |      | 15   | <i>Staphylococcus</i>   |
| 81             |    |       |    |             |    |      | 9    | <i>Stenotrophomonas</i> |
| 82             |    |       |    |             |    | 13   |      | <i>Streptomyces</i>     |
| N°<br>isolates | 25 | 24    | 23 | 25          | 21 | 17   | 23   |                         |



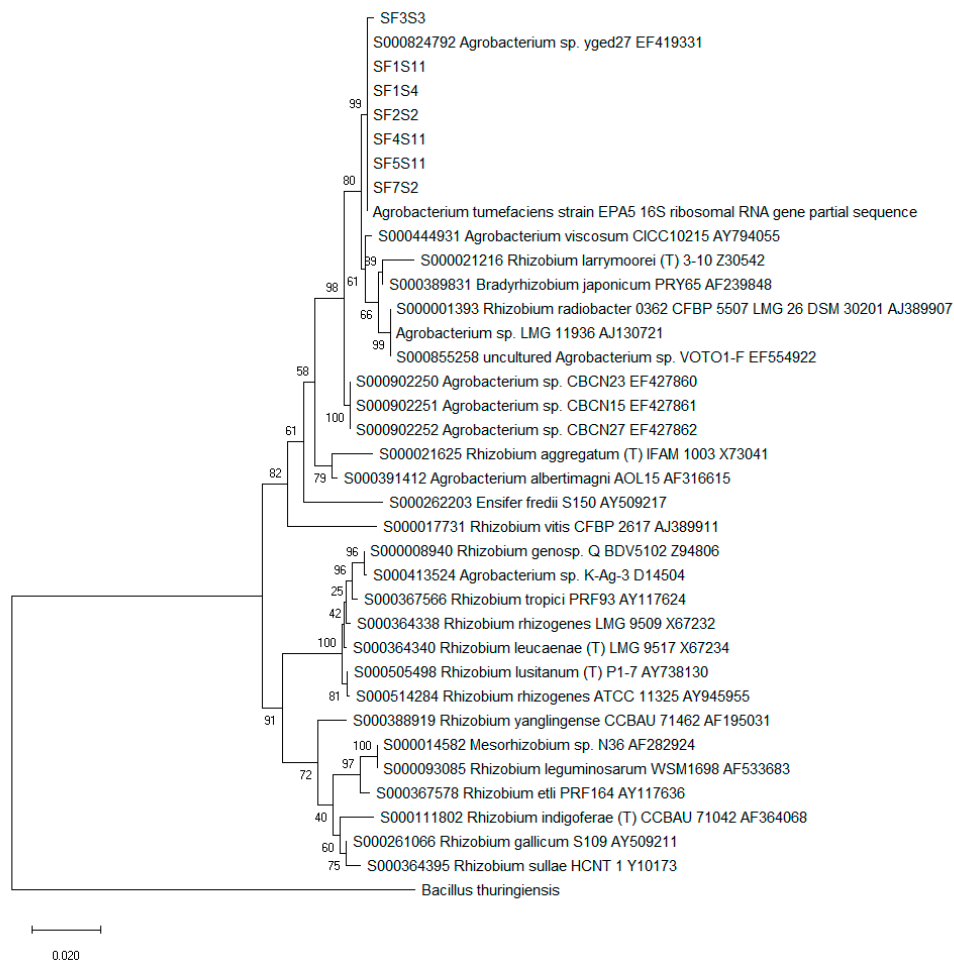

**Figure S5** Phylogenetic tree for the genera *Rhizobium* and *Agrobacterium*

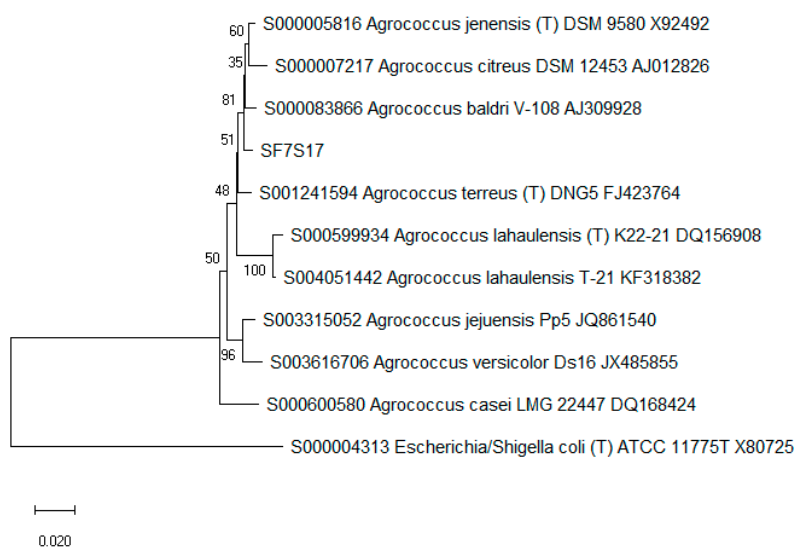

**Figure S6** Phylogenetic tree for the genus *Agrococcus*

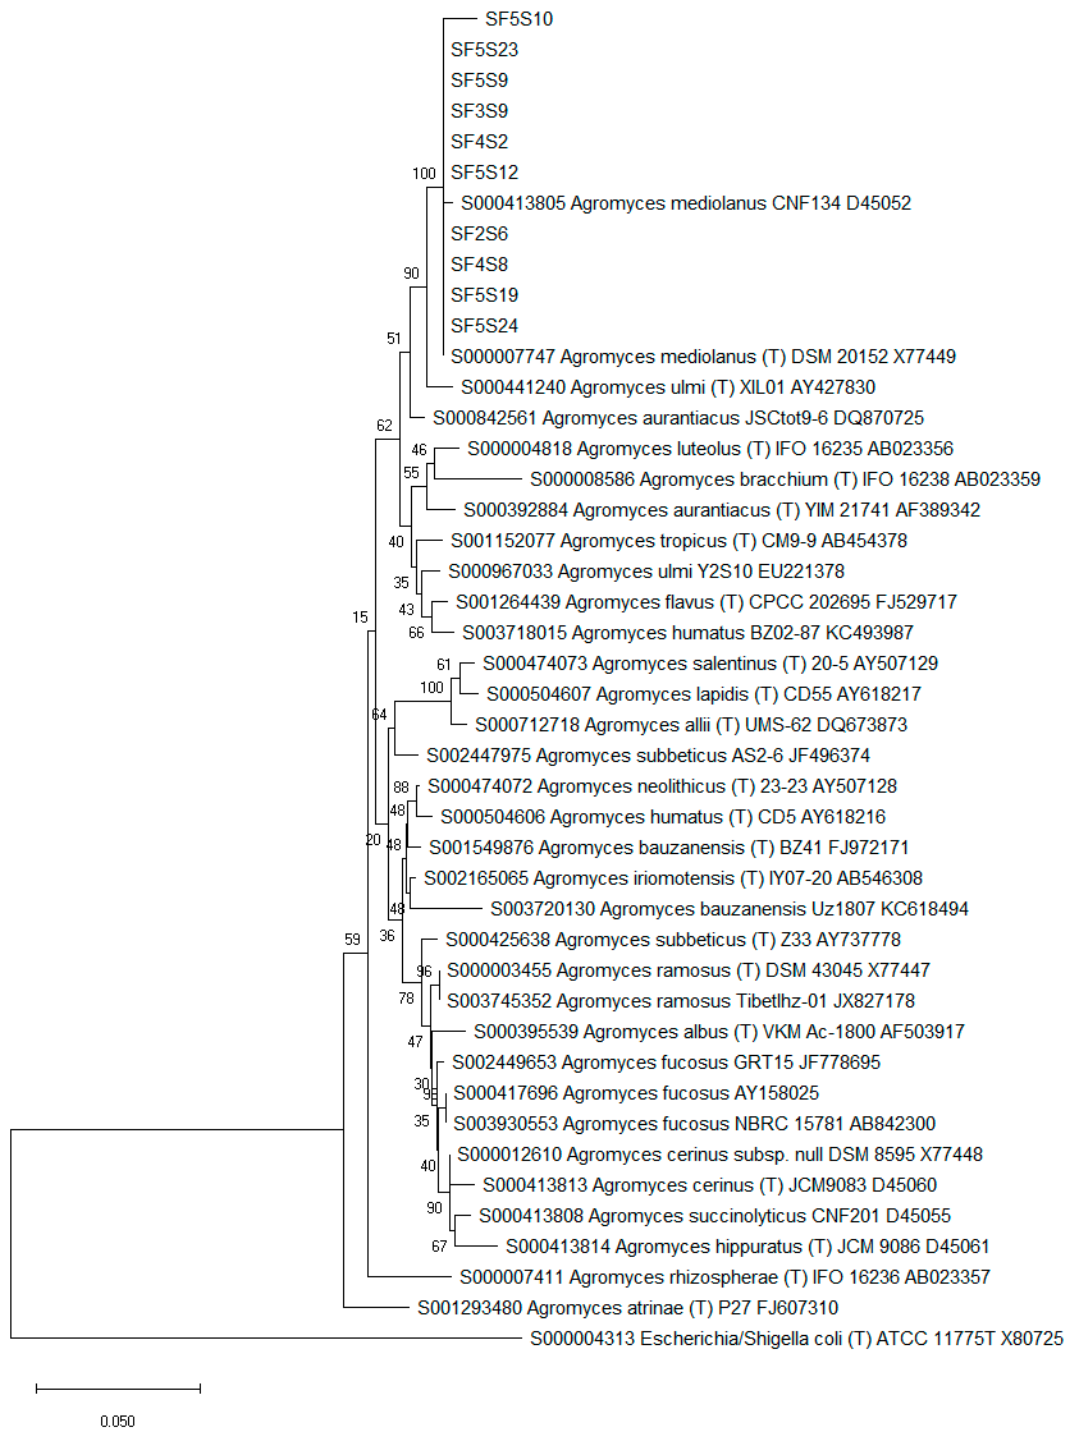

**Figure S7** Phylogenetic tree for the genus *Agromyces*

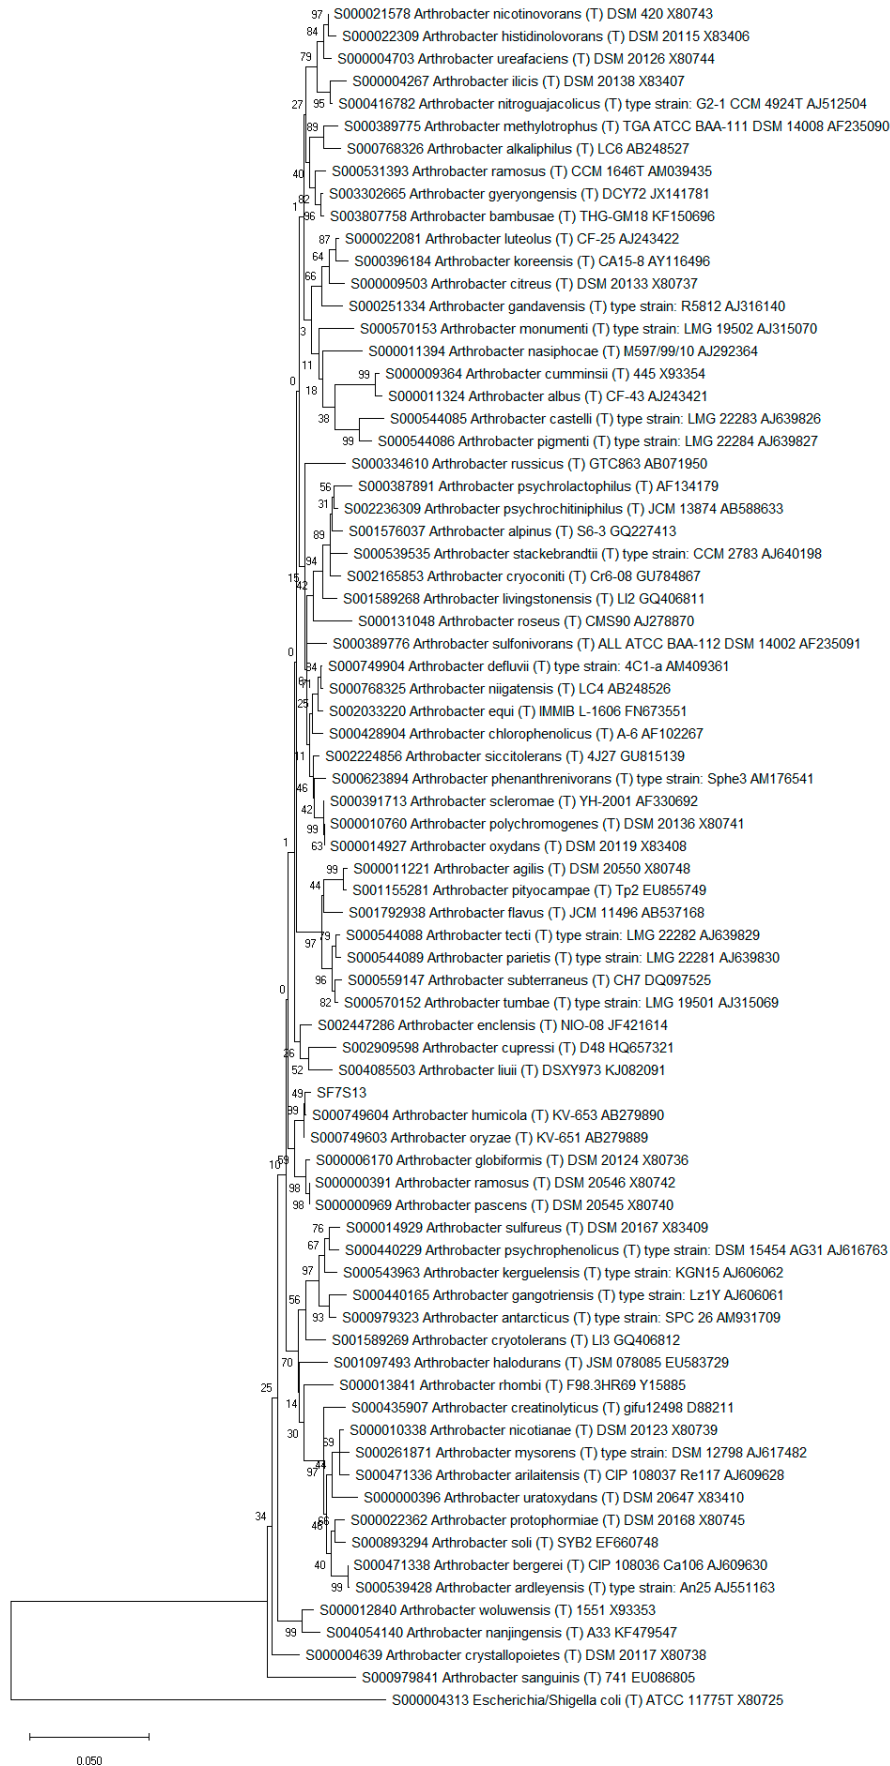

**Figure S8** Phylogenetic tree for the genus *Arthrobacter*

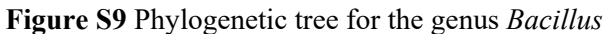

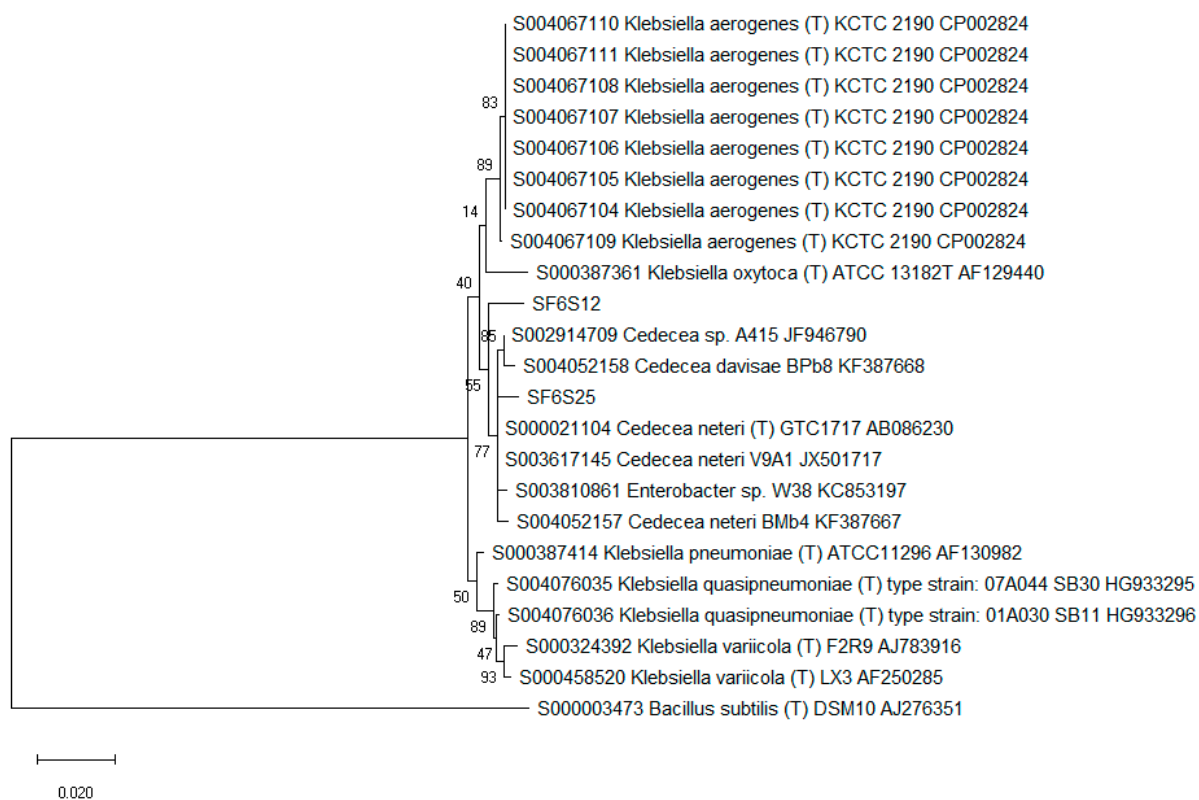

**Figure S10** Phylogenetic tree for the genera *Cedecea* and *Klebsiella*

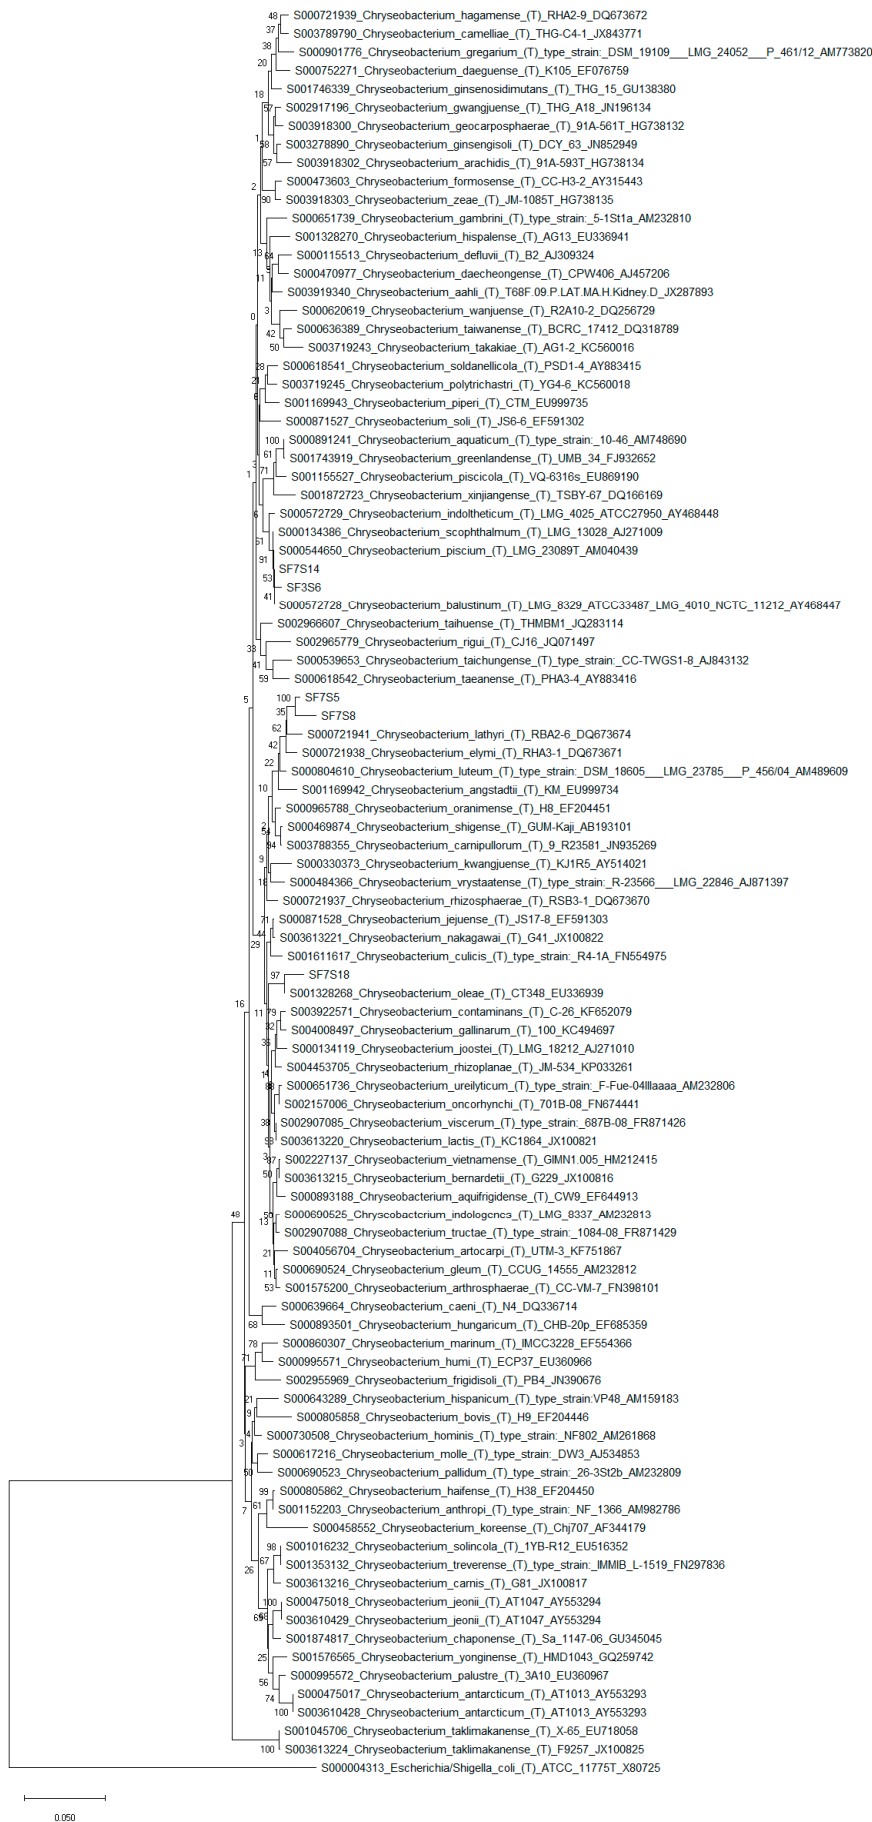

**Figure S11** Phylogenetic tree for the genus *Chryseobacterium*

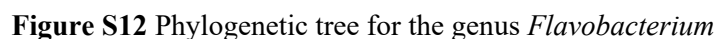



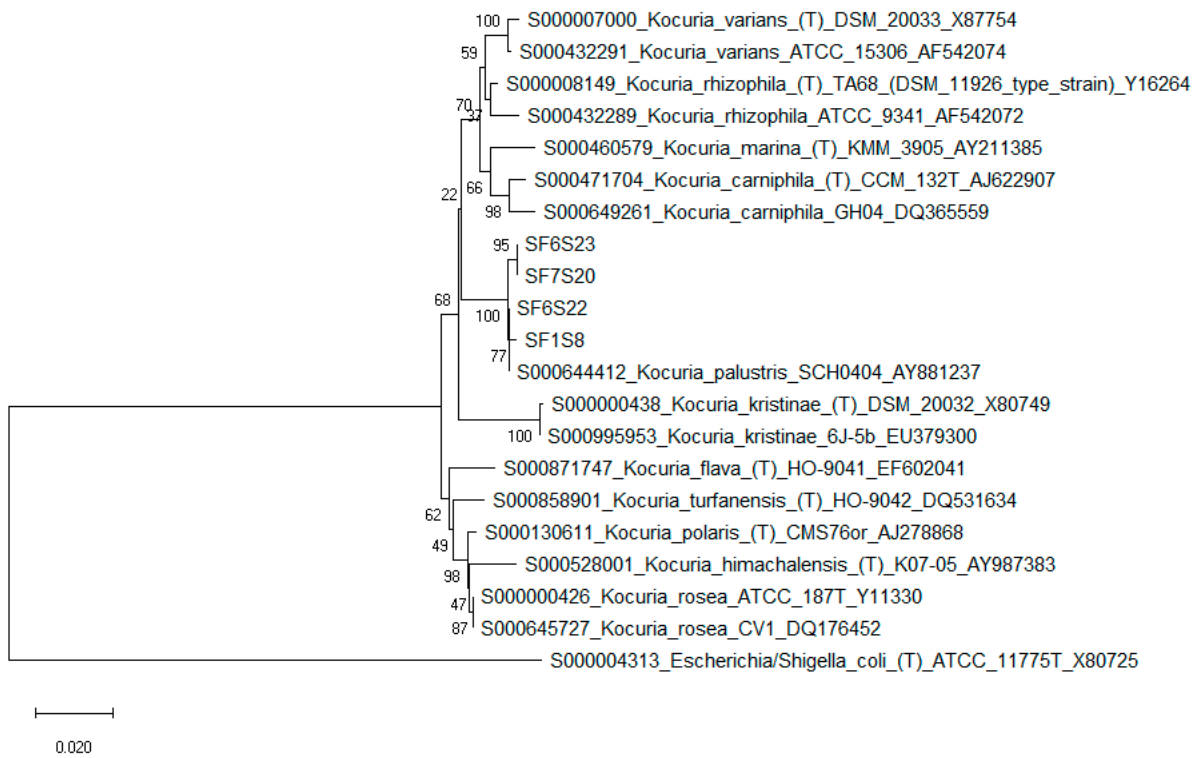

**Figure S13** Phylogenetic tree for the genus *Kocuria*



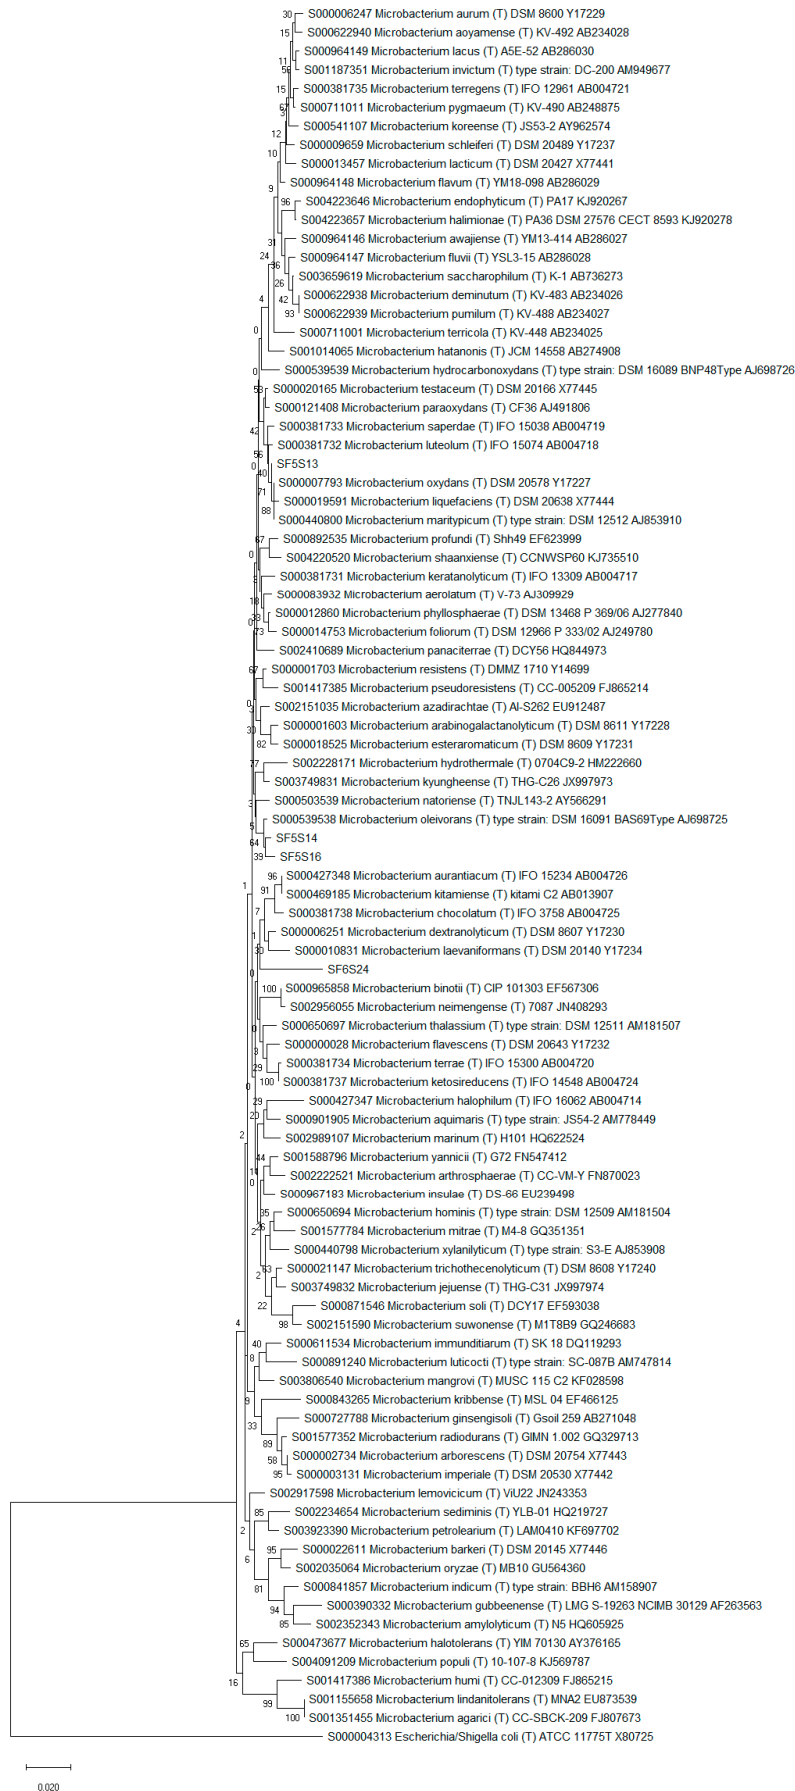

**Figure S14** Phylogenetic tree for the genus *Microbacterium*

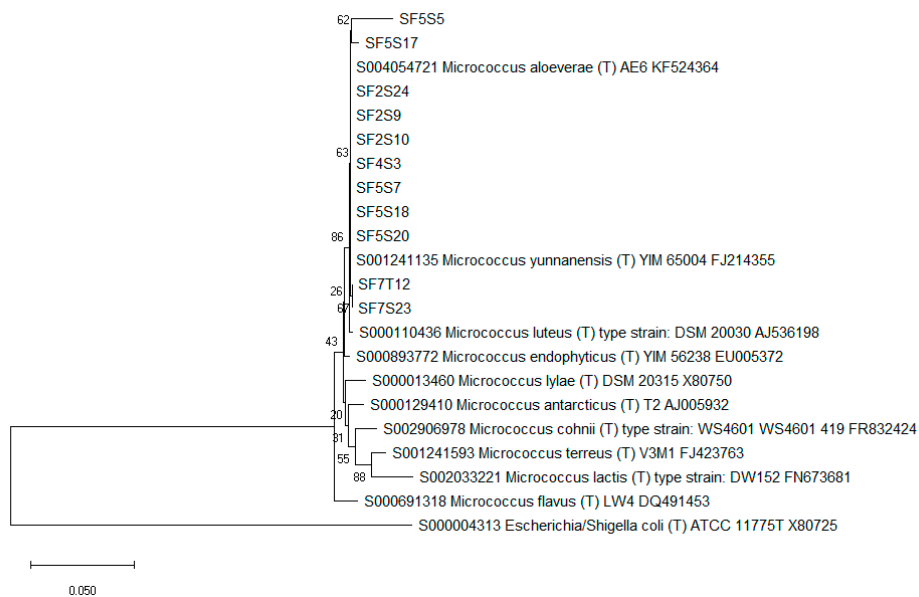

**Figure S15** Phylogenetic tree for the genus *Micrococcus*

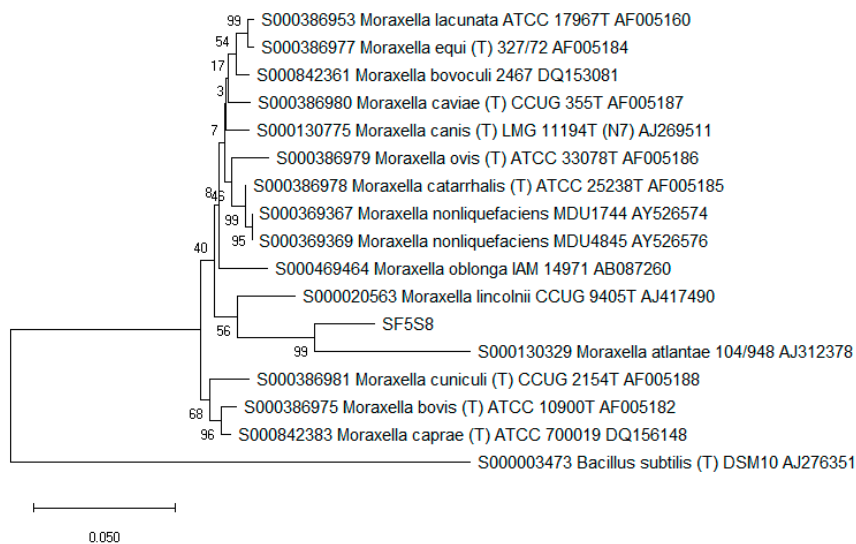

**Figure S16** Phylogenetic tree for the genus *Moraxella*

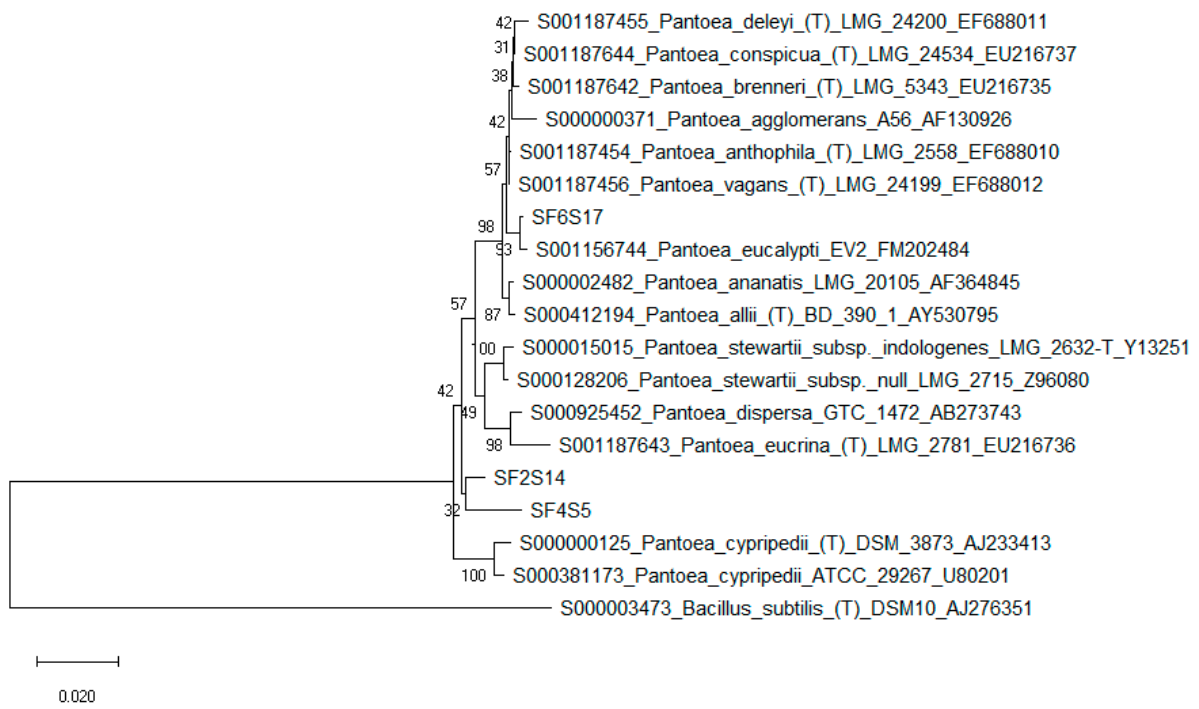

**Figure S17** Phylogenetic tree for the genus *Pantoea*

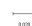

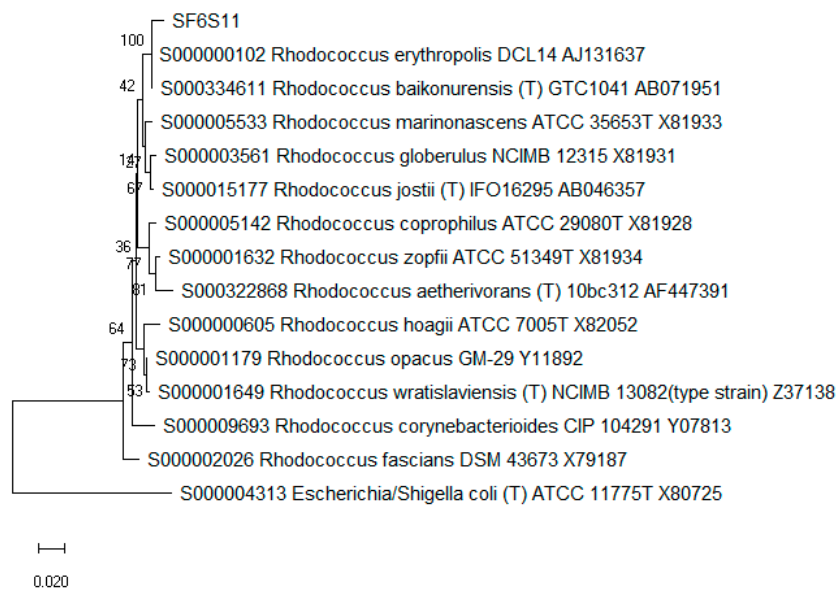

**Figure S19** Phylogenetic tree for the genus *Rhodococcus*

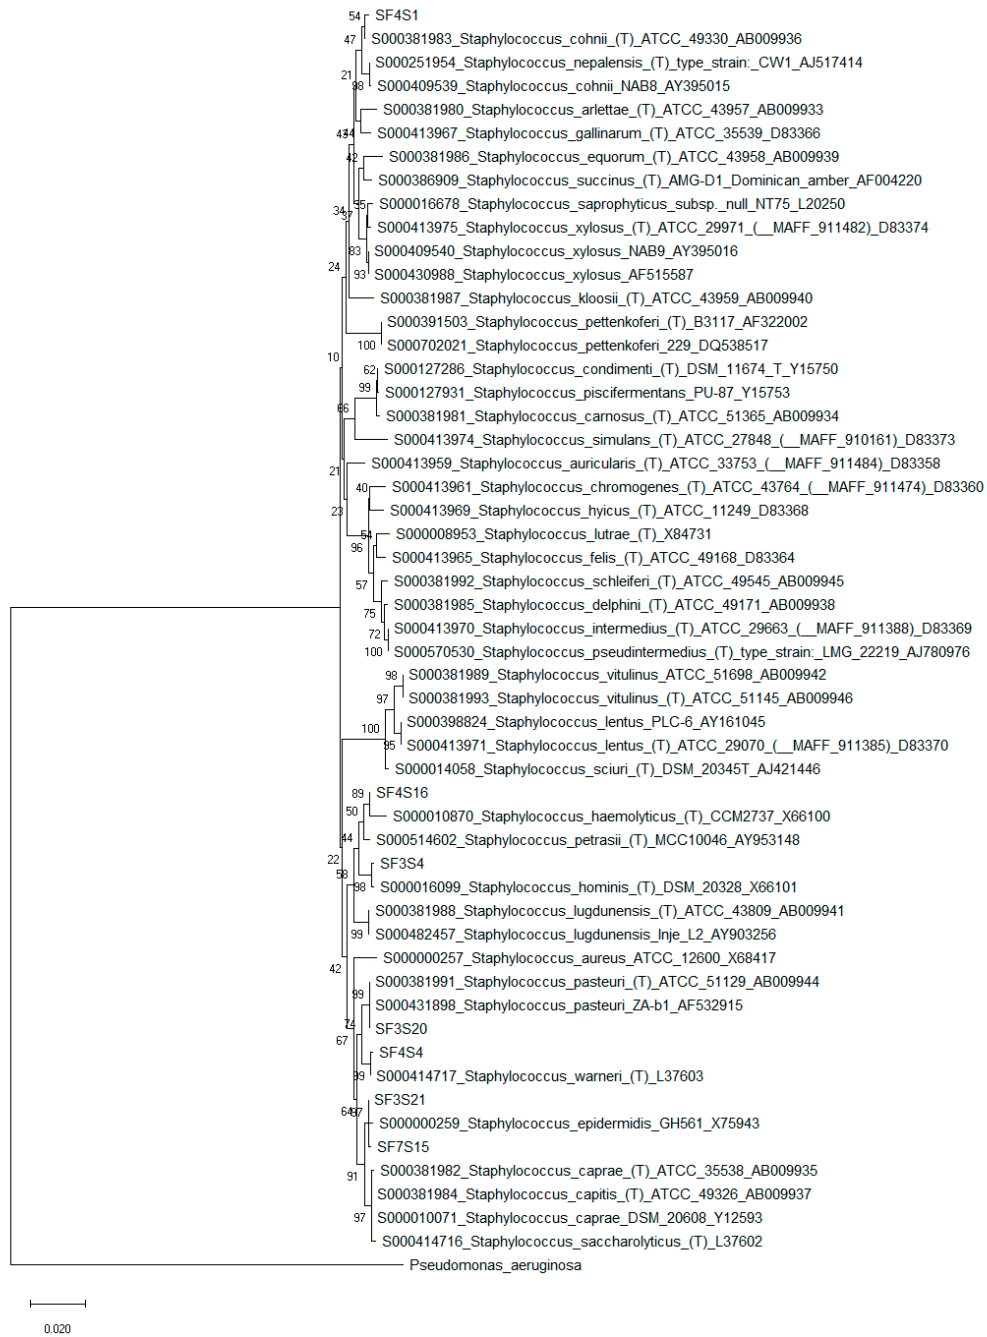

**Figure S20** Phylogenetic tree for the genus *Staphylococcus*

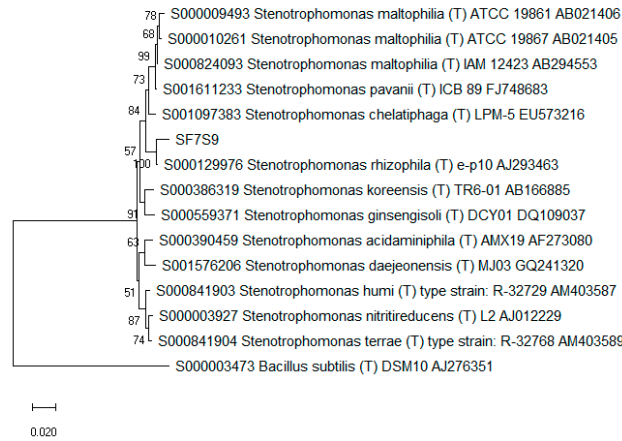

**Figure S21** Phylogenetic tree for the genus *Stenotrophomonas*

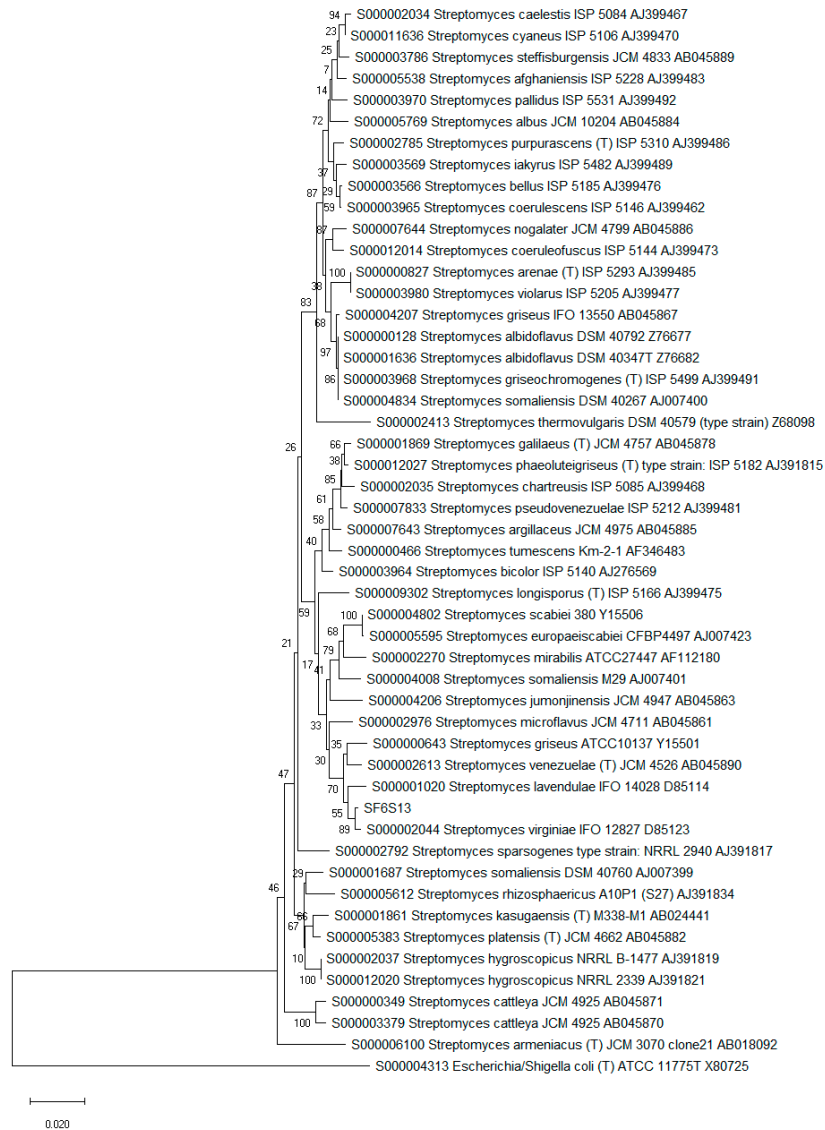

**Figure S22** Phylogenetic tree for the genus *Streptomyces*

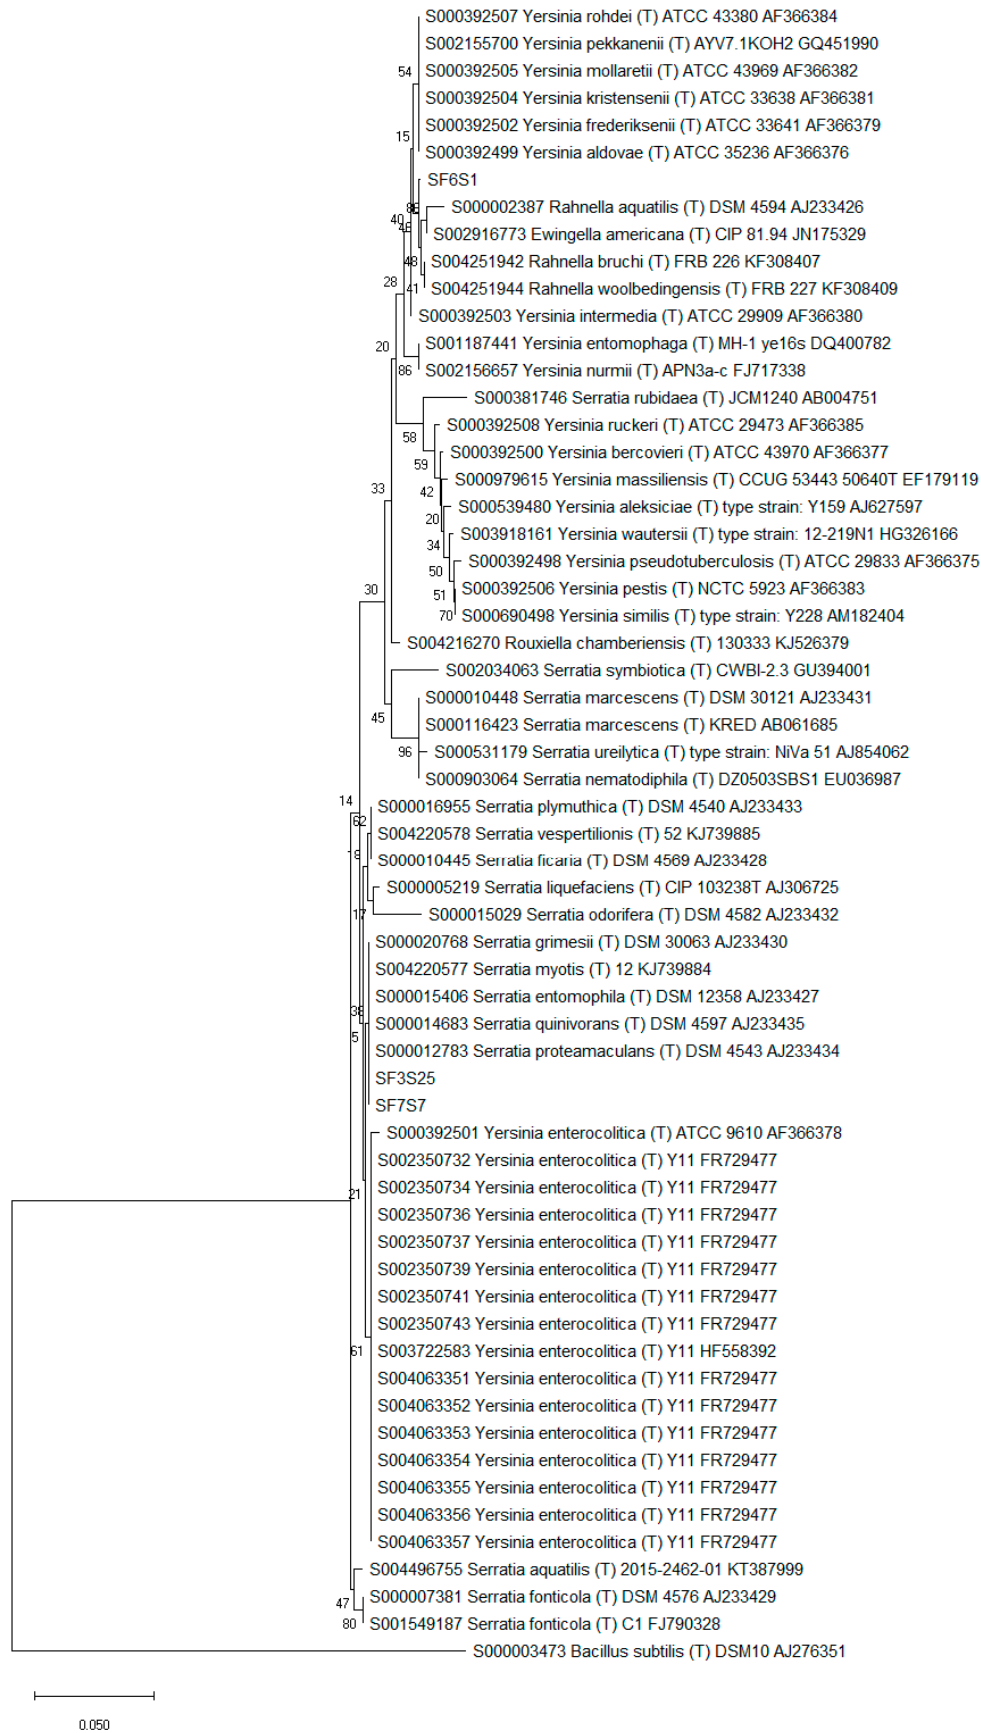

**Figure S23** Phylogenetic tree for the family *Yersiniaceae*
